# Supplementary material for: Achieving highly saturated single-color and high color-rendering-index white light-emitting electrochemical cells by CsPbX3perovskite color conversion layers
Source: Royal Society of Chemistry journal article supplement (doi:10.1039/c8tc04451a), 2018-01-01
Supplement: c8tc04451a1.pdf [file c8tc04451a1.pdf]

*Supporting Information*

**Achieving Highly Saturated Single-Color and High Color-Rendering-Index White Light-Emitting Electrochemical Cells by CsPbX<sub>3</sub> Perovskite Color Conversion Layers**

Cheng-Ming Wang,<sup>a</sup> Yong-Ming Su,<sup>b</sup> Ting-An Shih,<sup>c</sup> Guan-Yu Chen,<sup>c</sup> Yan-Zhi Chen,<sup>a</sup> Chin-Wei Lu,<sup>c,\*</sup> Ing-Song Yu<sup>d</sup>, Zu-Po Yang<sup>b,\*</sup> and Hai-Ching Su,<sup>a,\*</sup>

<sup>a</sup> *Institute of Lighting and Energy Photonics, National Chiao Tung University, Tainan 71150, Taiwan*

<sup>b</sup> *Institute of Photonic System, National Chiao Tung University, Tainan 71150, Taiwan*

<sup>c</sup> *Department of Applied Chemistry, Providence University, Taichung 43301, Taiwan*

<sup>d</sup> *Department of Materials Science and Engineering, National Dong Hwa University, Hualien 97401, Taiwan*

To whom to correspond:

E-mail: [cwlu@pu.edu.tw](mailto:cwlu@pu.edu.tw); Fax: +886-4-26327554; Tel: +886-4-26328001-15213

E-mail: [zupoyang@nctu.edu.tw](mailto:zupoyang@nctu.edu.tw); Fax: 886-6-3032535; Tel: 886-6-3032121-57762

E-mail: [haichingsu@mail.nctu.edu.tw](mailto:haichingsu@mail.nctu.edu.tw); Fax: 886-6-3032535; Tel: 886-6-3032121-57792

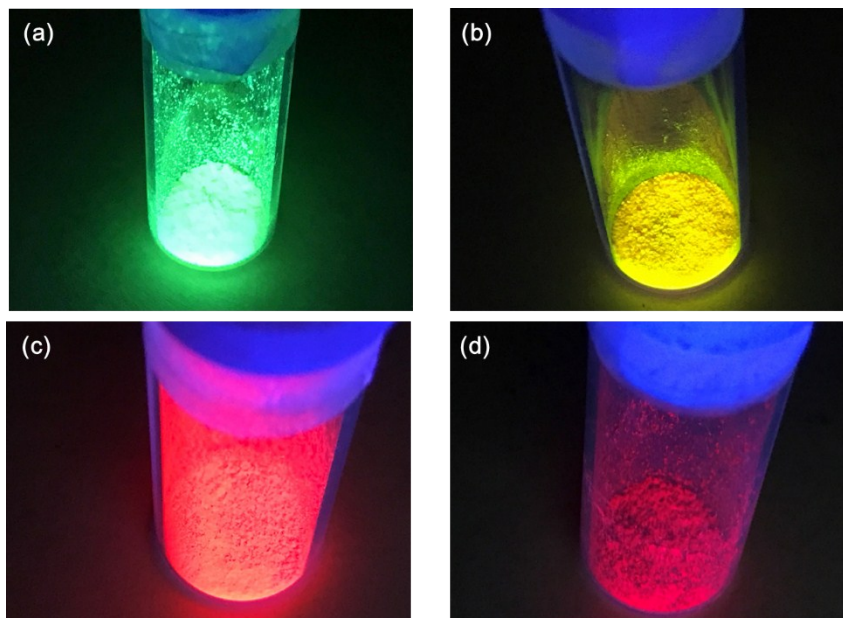

Figure S1 The photographs of powder form for different color perovskite nanocrystals embedded in silica matrix: (a) green, (b) yellow, (c) red and (d) deep red.

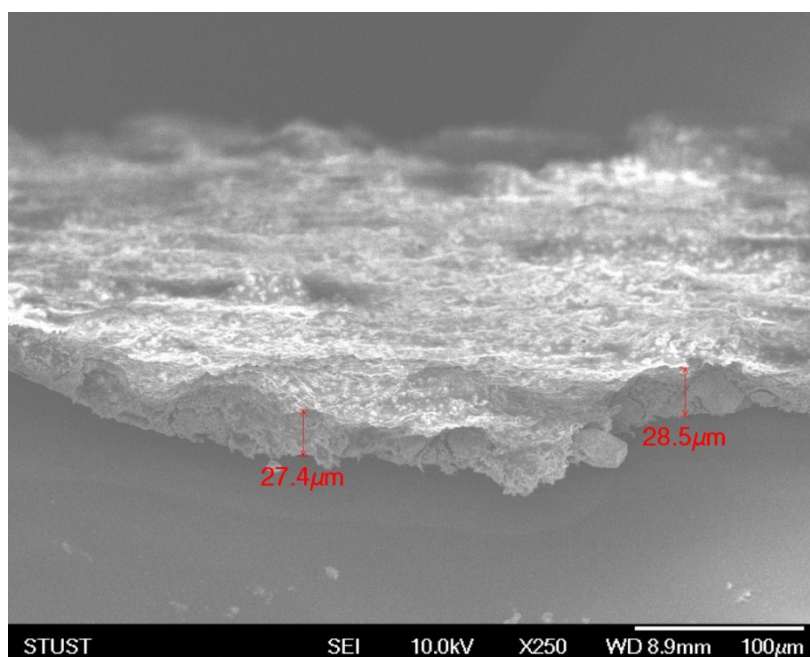

Figure S2 The cross sectional SEM image of the white CCL.

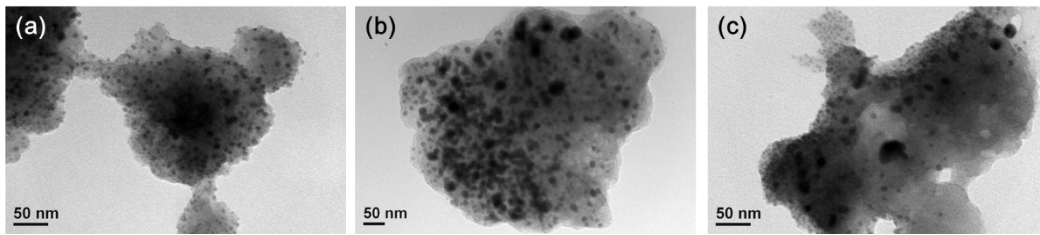

Figure S3 TEM images for (a) green, (b) yellow and (c) deep red perovskites nanocrystals embedded in silica matrix.
